# Supplementary material for: A convenient label free colorimetric assay for pyrophosphatase activity based on a pyrophosphate-inhibited Cu2+–ABTS–H2O2reaction
Source: Royal Society of Chemistry journal article supplement (doi:10.1039/c4an01415d), 2014-09-08
Supplement: c4an01415d1.pdf [file c4an01415d1.pdf]

## Electronic Supplementary Information (ESI)

### **A convenient label free colorimetric assay for pyrophosphatase activity based on pyrophosphate-inhibited $\text{Cu}^{2+}$ -ABTS- $\text{H}_2\text{O}_2$ reaction**

**Liangliang Zhang\*, Mei Li, Yingfeng Qin, Zhidan Chu, Shulin Zhao\***

*Key Laboratory for the Chemistry and Molecular Engineering of Medicinal Resources of*

*Education Ministry, Guangxi Normal University, Guilin, 541004, China.*

*E-mail: liangzhang319@163.com (L. Zhang), zhaoshulin001@163.com (S. Zhao)*

## 1. Supplementary Figures

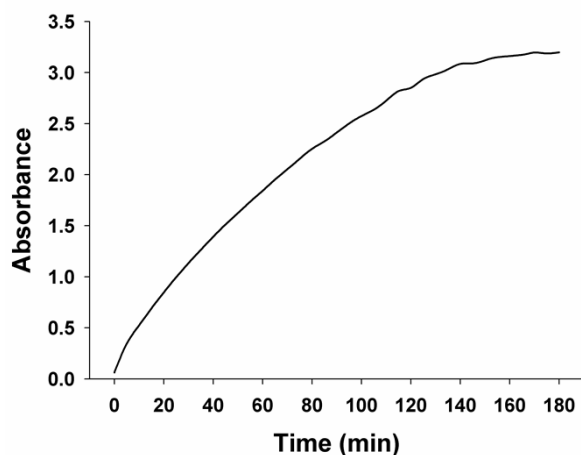

**Fig. S1** Real-time curve of absorbance at 418 nm after the addition of  $\text{Cu}^{2+}$  into ABTS/ $\text{H}_2\text{O}_2$  mixture. The concentrations of  $\text{H}_2\text{O}_2$ , ABTS and  $\text{Cu}^{2+}$  were 2 mM, 2 mM and 100  $\mu\text{M}$ , respectively.

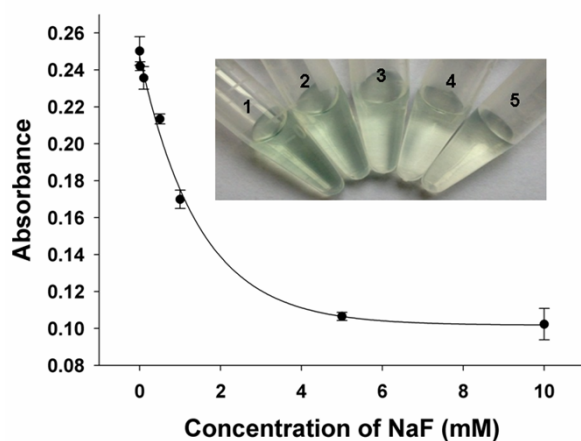

**Fig. S2** The inhibition effect of NaF on PPase activity. Inset: photographs of color changes in the presence of NaF with various concentrations. From 1 to 5, the NaF concentrations were 100  $\mu\text{M}$ , 500  $\mu\text{M}$ , 1 mM, 5 mM and 10 mM, respectively. The concentration of PPase was 0.15 U/mL. Error bars were estimated from three replicate measurements.

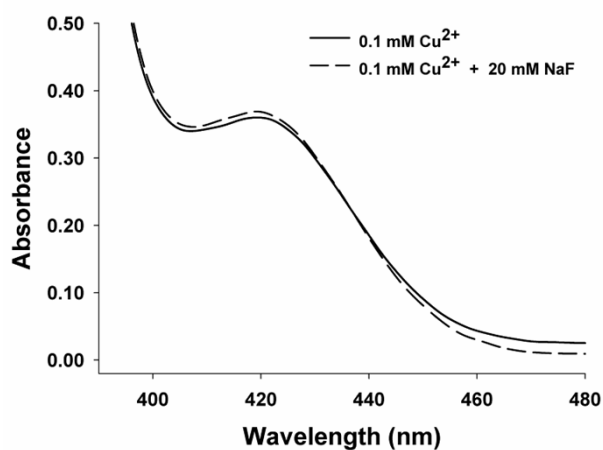

**Fig. S3** The effect of NaF on Cu<sup>2+</sup>-catalyzed ABTS-H<sub>2</sub>O<sub>2</sub> reaction.

## 2. Supplementary Table

**Table S1** Recovery experiments of PPase in serum samples

| Samples | Added PPase (U/mL) | Detected PPase <sup>a</sup> (U/mL) | Recovery (%) |
|---------|--------------------|------------------------------------|--------------|
| 1       | 0.000              | <0.03                              | -            |
| 2       | 0.200              | 0.196 ± 0.008                      | 98.0         |
| 3       | 0.250              | 0.242 ± 0.006                      | 96.8         |
| 4       | 0.350              | 0.347 ± 0.011                      | 99.1         |
| 5       | 0.400              | 0.419 ± 0.022                      | 104.8        |

<sup>a</sup> Average of three determinations ± standard deviation.
